# Supplementary material
Source: publisher figshare collection journal article supplement (https://frontiersin.figshare.com/ndownloader/files/13393406)
Supplement: Supplementary file 1 [file 13393406]

## Sheet: Sheet1
Table S2: Electron microprobe analysis of representative plagioclase phenocrysts
Sample #	IzOs-a06-4b (Y1Ca)		IzOs-5b (Y1Cb)		IzOs-3 (Y1L)		IzOs-2 (1950-51)		IzOs-7 (1986-87a)
	#43	#58	#9	#11	#3	#9	#9	#15	#7	#20
(wt.%)
SiO2	47.097	46.8069	46.696	46.362	46.921	48.177	46.3673	46.4129	46.601	46.841
Al2O3	33.0485	33.3188	33.43	33.245	33.504	32.411	33.6861	33.7267	33.489	33.411
FeOa	0.913861	0.926733	1.055	1.12	0.927	1.061	0.851485	1.04653	0.987	1.082
MgO	0.179208	0.10396	0.135	0.174	0.115	0.179	0.135644	0.107921	0.119	0.114
CaO	17.003	17.6208	16.951	17.229	16.807	15.915	17.6683	17.902	17.064	16.62
Na2O	1.6297	1.3495	1.303	1.37	1.212	1.721	1.16337	1.20891	1.212	1.456
K2O	0.0633663	0.0306931	0.012	0.034	0.017	0.019	0.0376238	0	0.018	0.034
Total	99.9347	100.157	99.582	99.554	99.51	99.495	99.9099	100.405	99.548	99.596
Si	2.17167	2.15623	2.15916	2.15	2.167	2.22083	2.14055	2.13581	2.15639	2.16517
Al	1.7962	1.80916	1.82198	1.81721	1.82386	1.76104	1.83302	1.82937	1.82657	1.82036
Fe	0.0352417	0.0357039	0.0407975	0.043438	0.0358053	0.040904	0.032875	0.0402766	0.0381965	0.0418282
Mg	0.0123182	0.00713909	0.00930526	0.0120286	0.00791734	0.0123004	0.00933474	0.00740319	0.00820857	0.00785526
Ca	0.840078	0.869772	0.839837	0.856113	0.831718	0.786097	0.873983	0.882713	0.84607	0.823174
Na	0.14571	0.120543	0.116824	0.123191	0.108536	0.153829	0.104138	0.10787	0.108746	0.130499
K	0.0037277	0.00180388	0.000707893	0.00201158	0.00100166	0.0011174	0.00221593	0	0.00106264	0.00200506
Total cation (O=8)	5.00495	5.00036	4.98861	5.00399	4.97584	4.97612	4.99612	5.00344	4.98524	4.9909
An content	85.2189	87.8278	87.7884	87.4206	88.4567	83.634	89.3532	89.1105	88.6108	86.3161
a Total Fe given as FeO.
